# Supplementary material
Source: ML conference proceedings conference paper supplement (https://openaccess.thecvf.com/content/WACV2024/html/Huber_Efficient_Explainable_Face_WACV_2024_paper.html)
Supplement: Supplementary file 1 [file Huber_Efficient_Explainable_Face_WACV_2024_supplemental.pdf]

# Efficient Explainable Face Verification based on Similarity Score Argument Backpropagation - Supplementary Material

Marco Huber<sup>1,2</sup>, Anh Thi Luu<sup>1</sup>, Philipp Terhörst<sup>3</sup>, Naser Damer<sup>1,2</sup>

<sup>1</sup> Fraunhofer Institute for Computer Graphics Research IGD, Darmstadt, Germany

<sup>2</sup> Department of Computer Science, TU Darmstadt, Darmstadt, Germany

<sup>3</sup> Paderborn University, Paderborn, Germany

Email: marco.huber@igd.fraunhofer.de

## 1. Introduction

This is the supplementary material to the paper: Efficient Explainable Face Verification based on Similarity Score Argument Backpropagation. We provide more examples in Figure 1 and 2 of our efficient approach to explain face verification decisions on the novel Patch-LFW dataset, and also more explanation examples of the investigated state-of-the-art approaches to allow a more complete comparison. in Figure 3 we provide some examples from the LFW dataset. The maps are not normalized.

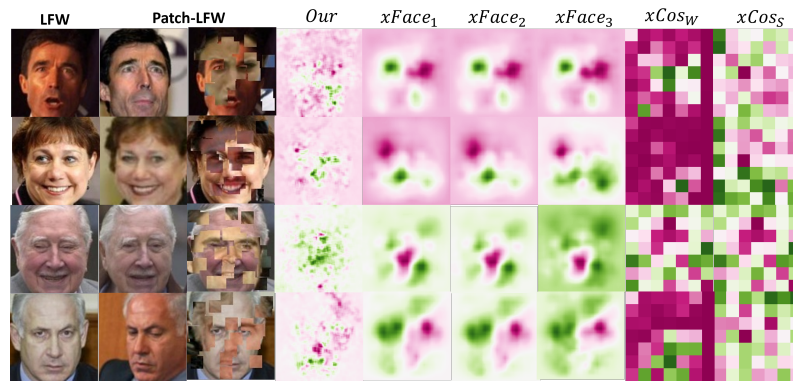

Figure 1. More "False Match" Examples from the Patch-LFW dataset.

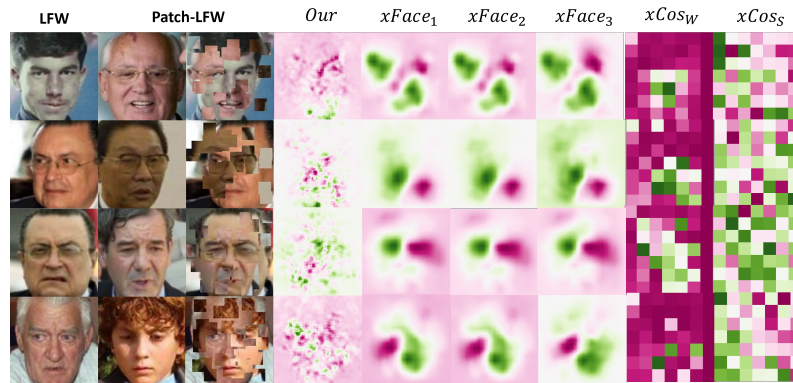

Figure 2. More "False Non Match" Examples from the Patch-LFW dataset.

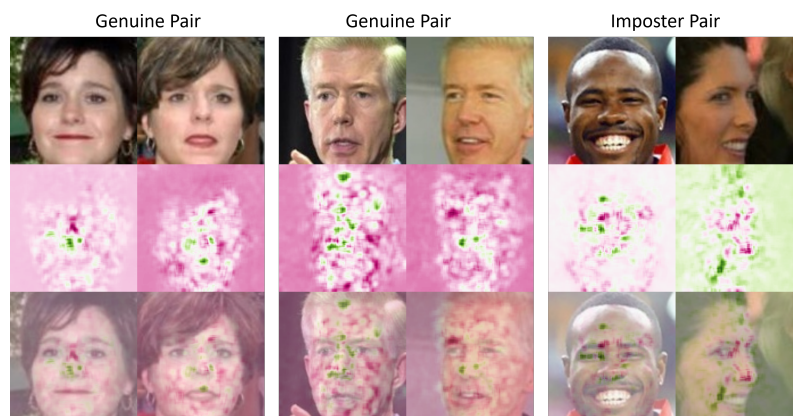

Figure 3. Examples taken from the LFW dataset.
